# Supplementary figures and images for: Characterization of blaNDM-5-and blaCTX-M-199-Producing ST167 Escherichia coli Isolated from Shared Bikes
Source: MDPI journal article supplement (doi:10.3390/antibiotics11081030), 2022-07-30

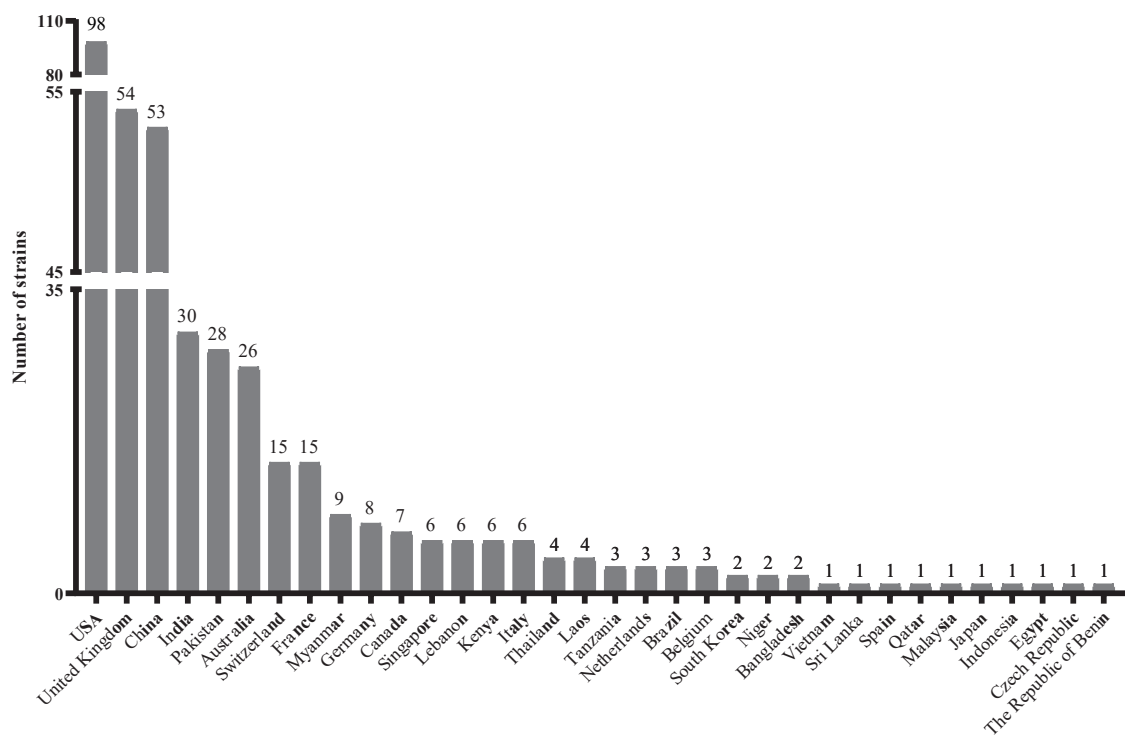

Figure S1. Number of ST 167 *E. coli* from different countries or districts

Supplement: s1 [file s1]
